# Supplementary material
Source: publisher figshare collection journal article supplement (https://rs.figshare.com/ndownloader/files/16700642)
Supplement: Supplementary file 1 [file 16700642]

**Supplementary Material**

Supplementary Methodology

*Focal organisms*

We sampled nests and trees that are part of the model *Azteca*-*Cecropia* mutualism. In this mutualism, *Azteca* ants nest inside living stems of *Cecropia* trees that are segmented with natural partitions that allow ant colonies to compartmentalize nest chambers for workers and brood (Fig. 1). Longino (1991) suggests that there is not a large amount of specificity in ant movement within the nest, as he found that “workers, males and alate queens were spread diffusely throughout the entire colony space”. The ants defend the trees against herbivores and vines (Agrawal and Dubin-Thaler 1999; Janzen 1969; Rocha and Bergallo 1992; Schupp 1986), while the trees provide nesting space and glycogen-rich food bodies (Müllerian bodies) to support the ants (Rickson 1976, Bischof et al. 2013). In general, *Azteca alfari* do not tend to forage outside the stems of their host plant, making this species of ant relatively inconspicuous (Longino 1996). The ants may also tend scale insects inside the tree, which produce honeydew as an additional food source for the ants (Longino 1991).

Here we sampled stem chambers of *Cecropia peltata*, which are distinguished from other *Cecropia* species within our study area based on leaf shape (Berg et al. 2005). During sampling, we collected worker ants that we later identified as *Azteca* *alfari* based on worker morphology (Longino 2007). *Azteca alfari* are obligate mutualists of *Cecropia* trees, though they may nest in different *Cecropia* tree species (Longino 1989). By contrast, *Cecropia* trees are not always inhabited by ants but perform better when ant colonies are present (Schupp 1986).

*Sequence filtering protocol*

The 16S OTU table was further filtered to remove chloroplast and mitochondrial DNA, as well as unclassified sequences, or those classified only to the level Bacteria or Archaea. This was done to remove sequences that were not microbial in origin based on comparison with BLAST sequence identities. Archaeal sequences composed only a minimal percentage of the 16S sequences and were removed for downstream bacterial analyses. A similar filtering method was performed on the ITS dataset to remove unclassified sequences, and those classified as Plantae, Protista, or unresolved Fungi. To remove potential contamination, OTUs present in the swab methodological control were removed from both the 16S (2.9% of 6943 OTUs) and ITS datasets (2.6% of 2982 OTUs). Bacterial sequences per sample ranged from 810-48456 (Mean: 18903, standard deviation: 13742). Fungal sequences per sample ranged from 792-30367 (Mean: 19541, standard deviation: 7595).

Supplementary References

Agrawal AA, Dubin-Thaler BJ. 1999. Induced responses to herbivory in the Neotropical ant-plant association between *Azteca* ants and Cecropia trees: Response of ants to potential inducing cues. *Behavioral Ecology and Sociobiology*, **45**, 47-54.

Berg CC, Rosselli PF, Davidson DW. 2005. Cecropia. *Flora Neotropica*, 1-230.

Bischof S, Umhang M, Eicke S, Streb S, Qi W, Zeeman SC. 2013. *Cecropia peltata* Accumulates Starch or Soluble Glycogen by Differentially Regulating Starch Biosynthetic Genes. *The Plant Cell*, **25**, 1400-1415.

Janzen DH. 1969. Allelopathy by myrmecophytes: the ant Azteca as an allelopathic agent of Cecropia. *Ecology*, **50**, 147-153.

Longino JT. 1989. Geographic variation and community structure in an ant-plant mutualism: *Azteca* and Cecropia in Costa Rica. *Biotropica*, 126-132.

Longino JT. 1991. Taxonomy of the Cecropia-inhabiting *Azteca* ants. *Journal of Natural History*, **25**, 1571-1602.

Longino JT. 1996. Taxonomic characterization of some live-stem inhabiting *Azteca* (Hymenoptera: Formicidae) in Costa Rica, with special reference to the ants of *Cordia* (Boraginaceae) and *Triplaris* (Polygonaceae). *Journal of Hymenoptera Research*, **5**, 131-156.

Longino JT. 2007. A taxonomic review of the genus *Azteca* (Hymenoptera: Formicidae) in Costa Rica and a global revision of the *aurita* group. Magnolia Press, Longwood, Fl.

Rickson FR. 1976. Anatomical development of the leaf trichilium and Müllerian bodies of Cecropia peltata L. *American Journal of Botany*, **63**, 1266-1271.

Rocha CFD, Bergallo HG. 1992. Bigger ant colonies reduce herbivory and herbivore residence time on leaves of an ant-plant: *Azteca muelleri* vs. *Coelomera ruficornis* on *Cecropia pachystachya*. *Oecologia*, **91**, 249-252.

Schupp EW. 1986. *Azteca* protection of Cecropia: Ant occupation benefits juvenile trees. *Oecologia*, **70**, 379-385.

| **Table S1** List of the top 10 most dominant animal pathogens located across a subset of sampling locations. Values represent average number of OTUs present in each sampling location. | | | |
| --- | --- | --- | --- |
| **Worker Chamber** |  | **Brood Chamber** |  |
| Species | # of OTUs | Species | # of OTUs |
| *Acremonium macroclavatum* | 1386.12 | *Acremonium macroclavatum* | 802 |
| *Cyberlindnera jadinii* | 82.86 | *Cyberlindnera jadinii* | 11.25 |
| *Coniosporium sp* | 71.71 | *Coniosporium sp* | 10.25 |
| *Malassezia restricta* | 6.42 | *Malassezia restricta* | 7.25 |
| *Aspergillus penicillioides* | 4.71428571 | *Acremonium polychromum* | 5.5 |
| *Coniosporium sp FY20_03* | 4.57142857 | *Candida tropicalis* | 4.5 |
| *Candida tropicalis* | 4 | *Candida athensensis* | 4.5 |
| *Simplicillium* | 3.71428571 | *Alternaria sp* | 4.5 |
| *Acremonium sp* | 3.57142857 | *Malassezia globosa* | 2.25 |
| *Acremonium sp* | 3.57142857 | *Alternaria sp* | 2 |
| **Empty Chamber** | | **Soil** |  |
| Species | # of OTUs | Species | # of OTUs |
| *Cyberlindnera jadinii* | 2497.5 | *Metacordyceps chlamydosporia* | 92 |
| *Candida tropicalis* | 383.5 | *Cryptococcus flavus* | 11 |
| *Malassezia restricta* | 234.5 | *Acremonium sp TR080* | 11 |
| *Candida metapsilosis* | 204.5 | *Simplicillium sp* | 5 |
| *Alternaria sp* | 181 | *Acremonium sp* | 5 |
| *Candida catenulata* | 119 | *Aspergillus cibarius* | 5 |
| *Cryptococcus heimaeyensis* | 96.5 | *Cordyceps bassiana* | 2 |
| *Malassezia globosa* | 92 | *Acremonium sp BRO_2013* | 2 |
| *Aspergillus penicillioides* | 66 | *Alternaria sp* | 2 |
| *Cryptococcus sp SN_82* | 41 | *Aspergillus cibarius* | 2 |

**Table S2** Results from PERMANOVA pairwise tests of bacterial and fungal communities across sampling locations.


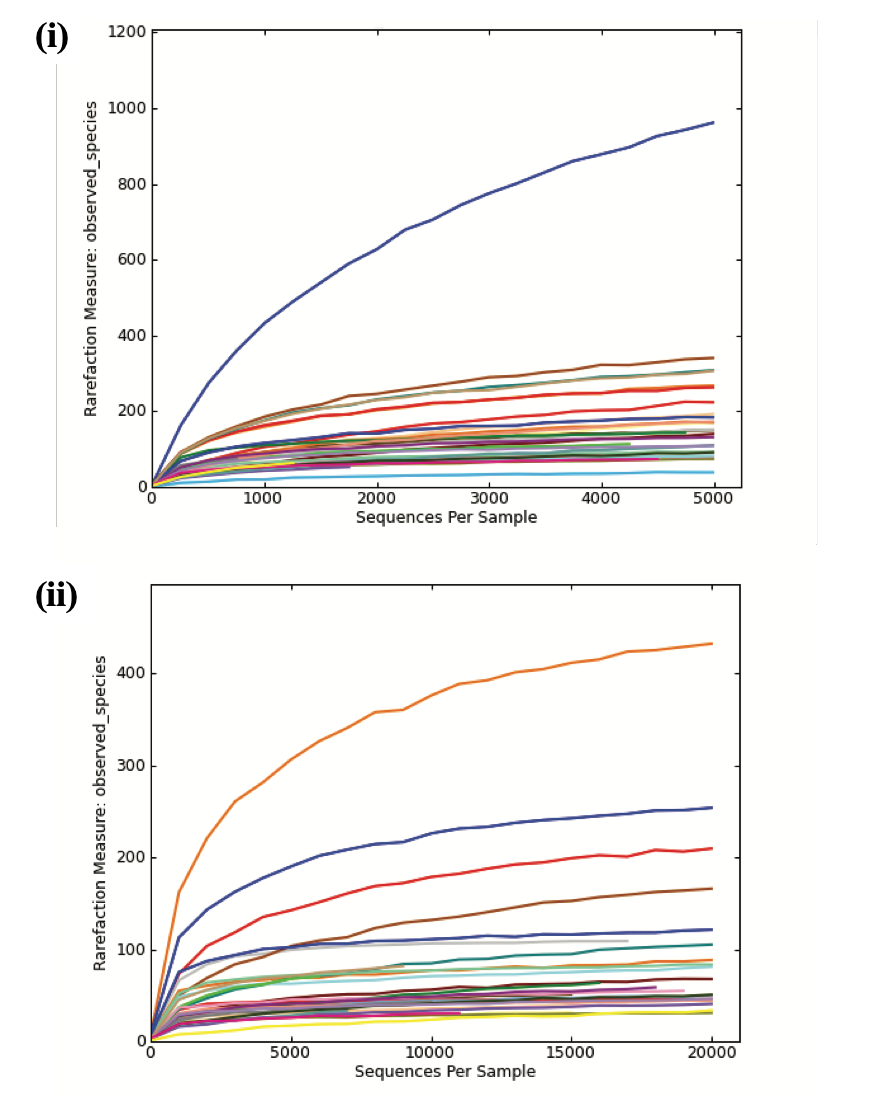


**Fig. S1** Alpha diversity rarefaction curves of (i) observed bacterial species and (ii) fungal species as a function of sequence sampling depth. Curves were generated using the alpha_rarefaction.py command in QIIME. Each line represents a unique sample.

**Fig S2** Differences in mean OTU richness across sampling locations. Boxes represent 95% confidence intervals. Bars denote minimum and maximum values excluding outliers, letters denote significant differences across sampling locations. Note that alpha diversity (observed OTUs) differs for bacterial communities, but does not differ for fungal communities.


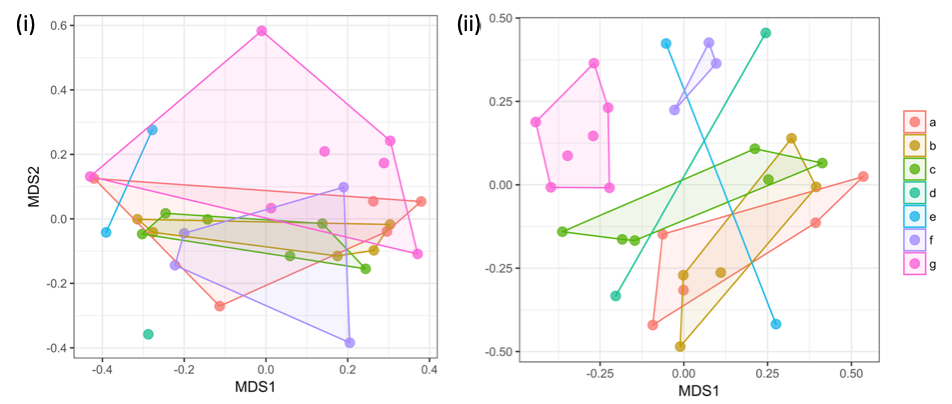


**Fig. S3:** Nonmetric multidimensional scaling for (i) bacterial and (ii) fungal communities of all samples organized by tree. Distances are based on dissimilarity matrices of sequence-based Bray-Curtis distances. Polygons connect the outermost points for each tree. Trees differ significantly from each other (PERMANOVA Bacteria: pseudo-F7,24=1.43, *P =* 0.01; Fungi: pseudo-F7,24=2.58, *P =* 0.001).


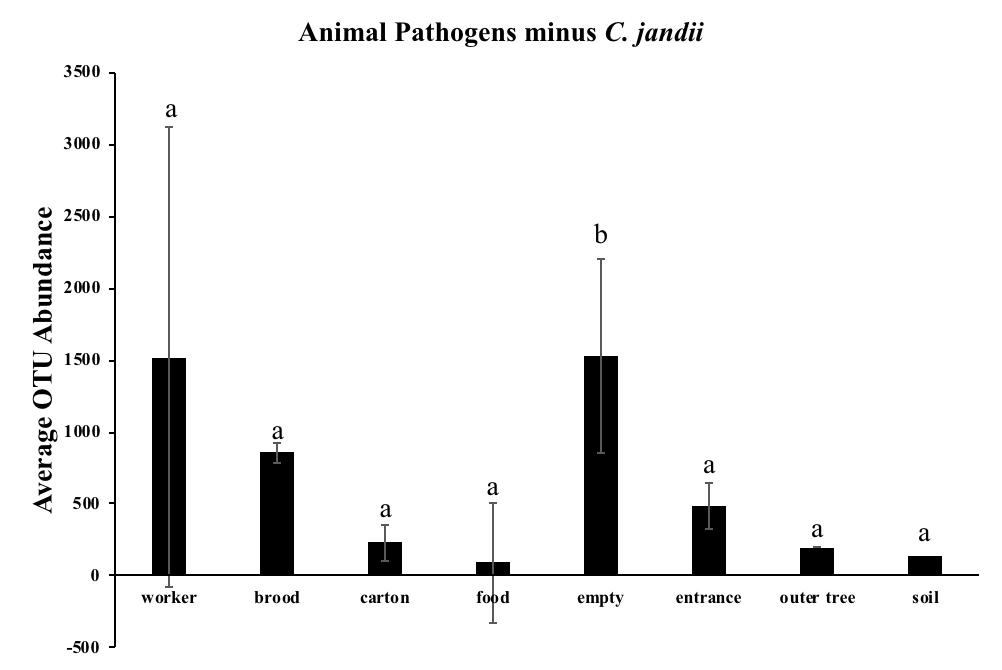


**Fig. S4** Average OTU abundance of animal pathogens in each location when *C. jandii* is excluded. Letters denote significant differences among locations based on the post-hoc tests of our linear mixed effects model.
